1 **Brief Communication**

2

3 ***In planta* genome editing with CRISPR/Cas9 ribonucleoproteins**

4

5 Yuya Kumagai<sup>1</sup>, Yuelin Liu<sup>1,a</sup>, Haruyasu Hamada<sup>2</sup>, Weifeng Luo<sup>1</sup>, Jianghui Zhu<sup>1</sup>, Misa  
6 Kuroki<sup>1</sup>, Yozo Nagira<sup>2</sup>, Naoaki Taoka<sup>2</sup>, Etsuko Kato<sup>3</sup>, Ryozi Imai<sup>1</sup>

7

8 <sup>1</sup>Genome Edited Crop Development Group, Division of Crop Genome Editing, Institute  
9 of Agrobiological Sciences, National Agriculture and Food Research Organization  
10 (NARO), Kannondai 3-1-3, Tsukuba, Ibaraki, 3058602, Japan

11

12 <sup>2</sup>Agri-Bio Research Center, Biotechnology Research Laboratories, KANEKA  
13 CORPORATION, Iwata, Shizuoka, 438-0802, Japan

14

15 <sup>3</sup>Structural Biology Team, Advanced Analysis Center, National Agriculture and Food  
16 Research Organization, Tsukuba, Ibaraki 305-8602, Japan.

17

18 <sup>a</sup>Current address: Institute of Plant and Food Science, Department of Biology, Southern  
19 University of Science and Technology, Shenzhen, Guangdong 518055, China

20

21

22

23

24 **\*Corresponding author: Ryozi Imai**

25 **e-mail: [rzi@affrc.go.jp](mailto:rzi@affrc.go.jp)**

26 **Abstract**

27 *In planta* genome editing represents an attractive approach to engineering  
28 crops/varieties that are recalcitrant to culture-based transformation methods. Here, we  
29 report the direct delivery of CRISPR/Cas9 ribonucleoproteins into the shoot apical  
30 meristem using *in planta* particle bombardment and introduction of a *semidwarf1 (sd1)*-  
31 orthologous mutation into wheat. The triple knockout *tasdl* mutant of an elite wheat  
32 variety reduced culm length by 10% without a reduction in yield.

33

## 34 Main

35 Shoot apical meristems (SAMs) maintain the potential to develop into floral  
36 organs. SAMs are generally composed of three independently dividing cell layers (L1 to  
37 L3), among which the cells of the sub-epidermal layer (L2) are destined to develop into  
38 germ cells, such as pollen grains and embryo sacs<sup>1,2</sup>. We developed a new  
39 transformation method, utilizing *in planta* particle bombardment (iPB), in which SAM  
40 tissue of wheat (*Triticum aestivum*) is subjected to biolistic transformation<sup>3</sup>. As this  
41 method does not require pre- or post-transformation tissue culture methodologies, it can  
42 be used to transform recalcitrant cultivars. With this method, transiently-expressed,  
43 clustered regularly interspaced short palindromic repeat (CRISPR)/Cas9 has been used  
44 to create genome edited plants<sup>4</sup>. Efficient DNA-free genome-editing systems have been  
45 recently developed using CRISPR/Cas9 ribonucleoproteins (RNPs) in plants. Direct  
46 delivery of CRISPR/Cas9 RNP into protoplasts<sup>5</sup>, fertilized eggs<sup>6</sup>, or immature  
47 embryos<sup>7,8</sup> has been successfully used to create genome-edited plants. These methods,  
48 however, require callus tissue culture and regeneration steps which may limit the  
49 application of this approach strictly to varieties that are amenable to cell/tissue culture.  
50 Here, we developed a direct delivery system of Cas9/gRNA RNP into SAMs and  
51 established a non-culture method to solve this limitation.

52 As shown in Fig. 1a, we delivered gold particles coated with CRISPR/Cas9  
53 RNPs to wheat SAMs (iPB-RNP method) as previously described<sup>3,4</sup> and screened E<sub>0</sub>  
54 genome-edited mutants by a cleaved amplified polymorphic sequences (CAPS) assay  
55 with 5<sup>th</sup> leaves. We first used *TaQsd1* as a target site and identified five E<sub>0</sub> positive  
56 mutants after two rounds of screening with a CAPS assay (Fig. 1b) which were  
57 subsequently validated by Sanger sequencing (Fig. 1c). A particular plant (Q2) was  
58 identified to contain mutations in all three homoeologous genes (Fig. 1c). In addition to  
59 screening the *TaQsd1* locus, we also deployed this strategy with additional target sites  
60 (TaOr\_t0, TaOr\_t1, TaHRGP-like1\_t2, Supplementary Table 3) and obtained promising  
61 editing efficiency (from 1% to 8.3%) in E<sub>0</sub> plants (Fig. 1d). Collectively, these results  
62 demonstrated that the iPB-RNP method is capable of being deployed for *in planta*  
63 genome editing with comparable efficiency to the iPB-DNA method<sup>9</sup>.

64 Currently, most wheat commercial cultivars carry a dominant allele of  
65 *REDUCED HEIGHT 1 (Rht1)*, a “Green Revolution” gene, encoding a GAI/DELTA  
66 protein<sup>10,11</sup>, and express a semidwarf phenotype due to partial gibberellic acid (GA)  
67 insensitivity. In contrast, the rice (*Oryza sativa*) semidwarf gene (*sd1*, *semidwarf 1*)  
68 encodes a GA20 oxidase, which is involved in GA biosynthesis<sup>12,13,14</sup>. The impact of the  
69 dominant/GA-insensitive and recessive/GA-deficient alleles in wheat and rice,

70 respectively, are affected by their ploidy level. Using genome editing strategies, it is  
71 plausible to introduce recessive *sd1* mutation in *Rht1* wheat and evaluate the effect of  
72 the double mutation. With a BLAST search of the Gramene database  
73 (<http://www.gramene.org>), we identified three homoeologous genes,  
74 TraesCS3A02G406200, TraesCS3B02G439900, and TraesCS3D02G401400, which  
75 encode proteins with 77-78% identity to the rice *sd1* gene (*OsGA20ox2*). A  
76 phylogenetic tree of rice and wheat GA20 oxidases identified four clades, each of which  
77 contains one rice and three or four wheat homoeologous genes (Supplementary Fig. 1).  
78 These results suggest that GA20 oxidases within a clade have an evolutionary  
79 conserved function. Thus, we concluded that *TaSD-A1*, *TaSD-B1* and *TaSD-D1* were  
80 the three wheat orthologs representing homoeologous genes to rice *sd1*.

81 To create a *tasdl* triple knockout mutant using CRISPR/Cas9 RNP, three  
82 single-guide RNA (sgRNA) target sequences (target\_1, \_2, and \_3) were designed that  
83 commonly appear within the *TaSD-A1*, *TaSD-B1*, and *TaSD-D1* genes (Fig. 2a).  
84 Evaluation of the sgRNA design was performed using an *in vitro* Cas9 digestion assay.  
85 The Cas9 protein *in vitro*-assembled with the target\_2 sgRNA exhibited complete  
86 digestion of the target genome sequence under the utilized conditions, while the  
87 target\_1 and the target\_3 sgRNAs were less efficient ((Supplementary Fig. 2).

88 Gold particles coated with the CRISPR/Cas9 (target\_2) RNP were bombarded  
89 into the SAMs of numerous imbibed wheat embryos, prepared as previously described,  
90 to enable large-scale screening for *tasdl* mutants. We observed undigested bands in 16  
91 plants among the 232 bombarded embryos that had been grown into mature plants,  
92 representing 6.9% of the total bombarded embryos (Fig. 2b). A CAPS assay, using  
93 genome-specific primers, followed by Sanger sequence analysis of the undigested  
94 bands, revealed that the mutations were distributed among the A, B, and D genomes  
95 (Fig. 2c, Fig. 2d). Sixteen positively-selected E<sub>0</sub> plants were subjected to E<sub>1</sub> genotype  
96 analysis. The CAPS assay detected mutant alleles of *tasdl* genes in E<sub>1</sub> plants derived  
97 from two E<sub>0</sub> plants (H7 and H14, in Fig. 2c, Supplementary Fig.4). Among H7- and  
98 H14-derived E<sub>1</sub> plants, the H7-1 plant did not display a digested band after *Sal* I  
99 treatment, suggesting that mutations had occurred in all six *TaSDI* genes  
100 (Supplementary Fig. 4, Fig.2c). The other E<sub>1</sub> plants displayed digested bands,  
101 suggesting WT or partial mutations in the hexaploid genome. A CAPS assay with  
102 genome-specific primers indicated that the H7-1 E<sub>1</sub> plant is a triple mutant (Fig. 2e).  
103 Sanger sequencing of the *Sal* I-resistant PCR amplicons revealed that the mutations in  
104 the H7-1 plant represent an A, a T, and an A insertion in the A, B, D genomes,  
105 respectively (Fig. 2e). These mutations caused frame shifts that resulted in putative

106 mRNAs with a premature stop codon or no stop codon, suggesting that the *TaSD1*  
107 function was knocked out in the H7-1 plant (Supplementary Fig. 6).

108 A primer set for *TaSD1* that spans an intron (common to the A, B, and D  
109 genomes) was designed and a semi-quantitative RT-PCR analysis was performed to  
110 analyze *TaSD1* expression in the H7-1 E<sub>1</sub> plants. Results indicated that expression of the  
111 *TaSD1* genes was completely silenced in H7-1 E<sub>1</sub> plants (Supplementary Fig. 5),  
112 suggesting the possibility of no-stop or nonsense-mediated mRNA decay.

113 The phenotype of the *tasdl* mutant was analyzed in the E<sub>3</sub> generation of the  
114 H7-1 line of wheat plants. Both wild-type (WT) and H7-1 mutant plants were grown  
115 under long day conditions in an environmentally-controlled growth room. The mutant  
116 plants exhibited greener leaf color and shorter plant height. The average final height of  
117 the plants was approximately 10% lower in the *tasdl* mutant (Fig 2f), relative to the  
118 height of WT plants. The average total number of grains and grain weight were nearly  
119 equivalent in WT and *tasdl* plants (Fig. 2g).

120 We predicted potential off-target, candidate sites using Cas-OFFinder and  
121 identified 10 candidates having at least two mismatches in the site for target 2. Among  
122 them, eight candidates exhibited the same pattern:

123 GGGTTGGAGGTTCTCGTCGAAGG (Underlined bases indicate the mismatches).

124 Therefore, three candidates were selected from among the eight candidates, and five  
125 primer sets were designed (Supplementary Table 1). The amplicons produced from the  
126 five primer sets were subsequently sequenced and no mutations were found in the  
127 potential off-target regions. These data indicate that the mutations occurred without  
128 causing any off-target mutations.

129 In summary, we successfully applied genome editing on different gene loci  
130 with the iPB-RNP method utilizing wheat SAMs as a tissue source. In addition, we also  
131 created a wheat line carrying both *Rht-B1b* and *sd1* together using genome editing and  
132 demonstrated the cumulative effect of the two ‘Green Revolution’ semidwarf genes.  
133 The 10% reduction in plant height achieved would further contribute to lodging  
134 resistance in current, widely-used cultivars. RNP-based direct delivery of CRISPR/Cas9  
135 has been successfully used to create genome-edited plants in several crop species<sup>5,7,8</sup>.  
136 The need for tissue/cell culture in the gene-editing methodology, however, hampers the  
137 broad utility of this approach for a wide range of commercial varieties in many crops,  
138 including maize and wheat. The iPB-RNP method described here represents an  
139 alternative approach for creating genome-edited wheat varieties. The efficiency of  
140 genome editing using the iPB-RNP method is comparable to the iPB-DNA method,  
141 which utilizes transient expression of CRISPR/Cas9 to accomplish genome editing<sup>4</sup>.

142 Since no transgene integration occurs when using Cas9 RNPs, the application of iPb-  
143 RNP method in practical breeding and commercialization has the potential for broad  
144 impact to modern agricultural applications.

145

146

## 147 **Methods**

148 **Preparation of SAMs.** The protocol for SAM preparation has been previously  
149 described. In brief, mature seeds of wheat (*Triticum aestivum*) ‘Haruyokoi’ (*RhtB1-b*,  
150 *RhtD1-a*) were sterilized with sodium hypochlorite and imbibed at 25°C overnight. The  
151 coleoptile and the first three leaves, which cover the SAM, were removed from the  
152 embryo under a stereo microscope using an insulin pen needle 34G ( $\phi$ 0.2 mm;  
153 TERUMO, Japan). The embryos were separated from the endosperm and placed upright  
154 in a petri dish containing Murashige and Skoog (MS) basal medium supplemented with  
155 maltose (30 g/L), 2-morpholinoethanesulfonic acid (MES) monohydrate (0.98 g/L, pH  
156 5.8), a plant preservative mixture (3%; Nacalai Tesque, Japan), and phytigel (7.0 g/L;  
157 Sigma Aldrich, USA). Thirty embryos were placed on the medium in each petri dish for  
158 each cycle of particle bombardment.

159

160 **Preparation of Cas9 protein and sgRNA.** Recombinant *Streptococcus pyogenes* Cas9  
161 protein was purified from *Escherichia coli* as previously described<sup>16</sup>. Single-stranded,  
162 guide RNA (sgRNA) was prepared using a GeneArt™ Precision gRNA synthesis Kit  
163 (Thermo Fisher Scientific, USA). The templates for the *in vitro* transcription were  
164 designed and amplified using appropriate primers (Supplementary Table 1,  
165 Supplementary Table 3) according to the manufacturer’s instructions.

166

167 ***In vitro* digestion of CRISPR/Cas9 RNP.** DNA fragments containing the target sites  
168 were amplified from genomic wheat DNA using designated primer sets (Supplementary  
169 Table 1, Supplementary Table 3), purified and dissolved in RNase-free water. Cas9  
170 protein (0.2  $\mu$ g) and sgRNA (0.2  $\mu$ g) were mixed and left for 10 min at room  
171 temperature to form an RNP complex. The RNP was incubated with the purified target  
172 DNA (100–200 ng) in CutSmart® buffer (New England BioLabs) in a total volume of  
173 10  $\mu$ L, and digestion was allowed to proceed for 1 h at 37°C. The digested products  
174 were then separated on a 3% agarose gel.

175

176 **Preparation of microprojectiles and biolistic delivery.** Gold particles coated with  
177 Cas9 RNP were prepared as previously described<sup>7</sup> with slight modification. The  
178 purified Cas9 protein (12 µg) and sgRNA (5 µg) were mixed in a binding buffer (20 µL)  
179 containing 5 µL of 10×CutSmart<sup>®</sup> buffer and 1µL of RNase inhibitor (40U, Takara,  
180 Japan) and left for 10 min at room temperature. After addition of 5 µL of TransIt  
181 transfection reagent (TaKaRa), the mixture was allowed to sit for an additional 5 min.  
182 Two hundred and seventy micrograms of gold particles (0.6 µm, InBio Gold, Australia)  
183 were added to the RNP mixture, tap-mixed, and then left to sit for 10 min. The gold  
184 particles were subsequently dispersed by slight sonication and 5 µL of the mixture was  
185 loaded onto a hydrophilic film (Scotchint, 3M, Japan), placed on a macrocarrier and  
186 allowed to air-dry at room temperature for 15 min. Bombardment was conducted using  
187 a PDS-1000/He<sup>TM</sup> device (Bio-Rad, USA) with a target distance of 6.0 cm from the  
188 stopping plate. The vacuum in the chamber was 27 inches of Hg and the helium  
189 pressure was 1350 psi. Bombardment was repeated three times per plate.

190

191 **Cleaved amplified polymorphic sequences (CAPS) analysis.** Genomic DNA was  
192 extracted from the fifth leaf of E<sub>0</sub> progeny and the first leaf of the E<sub>1</sub> progeny as  
193 previously described<sup>4</sup> For *TaOr* (AK457010.1) and *HPGP-like* (AK333546.1  
194 ), PCR amplification was conducted using KOD FX Neo DNA polymerase (Toyobo,  
195 Osaka, Japan) with gene specific primers (300 nM of each), and genomic DNA (50 ng).  
196 The mixture was denatured for 2 min at 98°C in a thermocycler and then subjected to 30  
197 cycles of amplification (98°C for 30 s, 60°C for 30 s, 68°C for 30 s). For *TaQsd1*  
198 (LC209619.1) and *TaSD1*, PCR amplification was conducted using TaKaRa LA Taq<sup>®</sup>  
199 with GC buffer (TaKaRa), gene specific primers (300 nM of each), and genomic DNA  
200 (50 ng). The mixture was denatured for 2 min at 94°C in a thermocycler and then  
201 subjected to 30 cycles of amplification (94°C for 30 s, 55°C for 30 s, 72°C for 20 s).  
202 The common primer and genome-specific primer sets used in the PCR are listed in  
203 Supplementary Table 1. The amplified PCR products were digested with *Pst* I  
204 (*TaQsd1*), *Nde* I (*HRGP-like1\_t2*), *Sal* I (*TaSD1\_t2*) or Cas9 RNPs (*TaOr\_t0* and  
205 *TaOr\_t1*) and subsequently analyzed by agarose gel electrophoresis. Undigested bands  
206 from the restriction enzyme digestion were purified and cloned into the pGEM-T easy  
207 vector (Promega, USA) or using Zero Blunt<sup>TM</sup> TOPO<sup>TM</sup> PCR Cloning Kit  
208 (Invitrogen<sup>TM</sup>, USA), and sequenced on a 3130xl Genetic analyzer (Applied  
209 Biosystems, USA).

210

211 **Plant growth conditions.** Twelve hours after bombardment, the embryos were  
212 transferred to a basal MS medium and cultured for 2–3 weeks in a growth chamber  
213 under long day conditions (16 h light/8 h darkness, 25°C). The seedlings were  
214 subsequently planted in pots (3 seedlings/pot,  $\phi$ 10.5 cm) and grown in a phytotron under  
215 long day conditions (16 h light/8 h darkness, 20°C).

216

217 **RT-PCR analysis.** Total RNA was isolated from leaf tissue using an RNeasy Mini Kit  
218 (Qiagen, Hilden, Germany) according to the manufacturer's protocol. First-strand  
219 cDNA was synthesized from total RNA (0.5  $\mu$ g) using a PrimeScript™ II 1st strand  
220 cDNA Synthesis Kit (TaKaRa, Japan). PCR was conducted with TaKaRa LA Taq® with  
221 GC buffer (TaKaRa) as follows: initial denaturation (94°C for 1 min), followed by 28  
222 cycles (98°C for 10 s, 55°C for 15 s, and 72°C for 30 s) using specific primers for 18S  
223 rRNA and *TaSDI* (Supplementary Table 1).

224

225 **Phylogenetic tree.** The amino acid sequences of GA20ox proteins were obtained from  
226 the Gramene database (<http://www.gramene.org/>). A phylogenetic tree was constructed  
227 using the neighbor-joining method. Bootstrap values were calculated from 1000  
228 replicates.

229

230 **Off-target detection.** PCR analysis was conducted to detect off-target mutagenesis in  
231 E<sub>1</sub> mutants. Off-target sites were identified by Cas-OFFinder  
232 (<http://www.rgenome.net/cas-offinder/>)<sup>17</sup>. DNA was isolated from the first leaf of E<sub>1</sub>  
233 plants, as previously described<sup>15</sup>. Each PCR was conducted using TaKaRa LA Taq®  
234 with GC buffer (TaKaRa), according to the manufacturer's instructions, along with the  
235 designated primers (300 nM of each: Supplementary Table 1) and genomic DNA (50  
236 ng). The mixture was denatured for 2 min at 94°C in a thermocycler and then subjected  
237 to 30 cycles of amplification (94°C for 30 s, 55°C for 30 s, 72°C for 30 s). The resulting  
238 PCR products were then sequenced and analyzed.

239

240 **Sequencing analysis.** PCR products used in the CAPS analysis and off-target detection  
241 were cloned into pCR-BluntII-TOPO (Thermo Fisher Scientific, USA) and sequenced  
242 on a 3130xL genetic analyzer (Applied Biosystems, USA).

243

244 **Data Availability.** All data generated or analyzed during this study are included in this  
245 published article (and its Supplementary Information files). Regarding sequence data,



246 the NCBI GenBank identifiers are: LC209619.1 (*TaQsd1*), AK457010.1(*TaOr*),  
247 AK333546.1 (*TaHRGP-like*) and LN828667.1 (*TaSD1*).

248

## 249 **References**

250

- 251 1. Goldberg, R. B., Beals, T. P. & Sanders, P. M. Anther Development : Basic  
252 Principles and Practical Applications. *Plant Cell* **5**, 1217–1229 (1993).
- 253 2. Reiser, L. & Fischer, R. L. The ovule and the embryo sac. *Plant Cell* **5**, 1291–  
254 1301 (1993).
- 255 3. Imai, R. *et al.* *In planta* particle bombardment (iPB): A new method for plant  
256 transformation and genome editing. *Plant Biotechnol.* **37**, 171–176 (2020).
- 257 4. Hamada, H. *et al.* Biolistic-delivery-based transient CRISPR/Cas9 expression  
258 enables in planta genome editing in wheat. *Sci. Rep.* **8**, 14422 (2018).
- 259 5. Woo, J. W. *et al.* DNA-free genome editing in plants with preassembled  
260 CRISPR-Cas9 ribonucleoproteins. *Nat. Biotechnol.* **33**, 1162–1164 (2015).
- 261 6. Toda, E. *et al.* An efficient DNA- and selectable-marker-free genome-editing  
262 system using zygotes in rice. *Nat. Plants* **5**, 363–368 (2019).
- 263 7. Svitashhev, S., Schwartz, C., Lenderts, B., Young, J. K. & Mark Cigan, A.  
264 Genome editing in maize directed by CRISPR–Cas9 ribonucleoprotein  
265 complexes. *Nat. Commun.* **7**, 13274 (2016).
- 266 8. Liang, Z. *et al.* Efficient DNA-free genome editing of bread wheat using  
267 CRISPR/Cas9 ribonucleoprotein complexes. *Nat. Commun.* **8**, 1–5 (2017).
- 268 9. Liu, Y. *et al.* *In planta* Genome Editing in Commercial Wheat Varieties. *Front.*  
269 *Plant Sci.* **12**, 648841 (2021).
- 270 10. Hedden, P. The genes of the Green Revolution. *Trends Genet.* **19**, 5–9 (2003).
- 271 11. Peng, J. *et al.* ‘Green revolution’ genes encode mutant gibberellin response  
272 modulators. *Nature* **400**, 256–261 (1999).
- 273 12. Monna, L. *et al.* Positional Cloning of Rice Semidwarfing Gene , *sd-1* : Rice  
274 “ Green Revolution Gene ” Encodes a Mutant Enzyme Involved in Gibberellin  
275 Synthesis. **17**, 11–17 (2002).
- 276 13. Sasaki, A. *et al.* Green revolution: A mutant gibberellin-synthesis gene in rice.  
277 *Nature* **416**, 701–702 (2002).
- 278 14. Spielmeier, W., Ellis, M. H. & Chandler, P. M. Semidwarf (*sd-1*), ‘green  
279 revolution’ rice, contains a defective gibberellin 20-oxidase gene. *Proc. Natl.*  
280 *Acad. Sci.* **99**, 9043–9048 (2002).

- 281 15. Peng, J. *et al.* The Arabidopsis GAI gene defines a signaling pathway that  
282 negatively regulates gibberellin responses. *Genes Dev.* **11**, 3194–3205 (1997).
- 283 16. Hamada, H. *et al.* An in planta biolistic method for stable wheat transformation.  
284 *Sci. Rep.* **7**, 11443 (2017).
- 285 17. Kunitake, E. *et al.* CRISPR/Cas9-mediated gene replacement in the  
286 basidiomycetous yeast *Pseudozyma antarctica*. *Fungal Genet. Biol.* **130**, 82–90  
287 (2019).
- 288 18. Bae, S., Park, J. & Kim, J. S. Cas-OFFinder: A fast and versatile algorithm that  
289 searches for potential off-target sites of Cas9 RNA-guided endonucleases.  
290 *Bioinformatics* **30**, 1473–1475 (2014).
- 291
- 292

293 **Acknowledgements**

294 We are grateful to Dr. Yukiko Osawa for the help in CAPS screening of the mutants.

295 We also thank Dr. Masaki Endo for helpful discussions. This work was supported in

296 part by grants from JSPS KAKENHI (JP17K19249) and NARO Bio-oriented

297 Technology Research Advancement Institution (Research

298 program on development of innovative technology) to R.I .

299

300 **Author contributions**

301 R.I. conceived and supervised the study. Y.K. and R.I. designed the experiments. Y.K.,

302 Y.L., W.L., J.Z. and M.K. conducted the experiments. W.L., J.Z., M.K., H.H., Y.N.,

303 N.T., and R.I. analyzed data. Y.K., W.L. and R.I. wrote the manuscript.

304

305 **Competing interests**

306 H.H., Y.N., and N.T. are employed by Kaneka Corporation. RI received research

307 support from Kaneka Corporation. The authors declare no competing interests.

308

## 309 **Figure Legends**

310

### 311 **Figure 1. *In planta* RNP-mediated genome editing in wheat**

312 **a**, The workflow of iPB-RNP method utilizing wheat SAMs. **b**, CAPS analysis of E<sub>0</sub>  
313 plants at the *TaQsd1* locus. The PCR products were amplified by an A, B, and D genome  
314 common primer set. WT, undigested PCR products; WT/+, *Pst* I digested PCR  
315 products. Red and blue arrows indicate undigested and digested bands after *Pst* I  
316 treatment, respectively. A 100 bp ladder was used as a size marker. **c**, The genotypes of  
317 Q1, Q5, Q7, Q8 and Q9 as identified by sequencing. The black and red characters indicate  
318 the gRNA and PAM sequences, respectively. The *Pst* I restriction site is  
319 underlined. Nucleotides inserted are shown in green characters. **d**, Summary of genome  
320 editing experiment on locus sites of *TaQsd1*, *TaOr\_t0*, *TaOr\_t1* and *TaHRGP-like\_t2*  
321 using the iPB-RNP method.

322

323

### 324 **Figure 2. Introduction of *sd1* mutations in wheat**

325 **a**, Target sequences conserved among the three homoeologous *TaSD1* genes were  
326 selected using the CRISPRdirect software. The locations of the target sequences are  
327 indicated by arrows. The boxes and lines indicate exons and introns, respectively. The  
328 three exons in *TaSD1* are numbered. **b**, Summary of the CAPS analysis of bombarded E<sub>0</sub>  
329 plants and their progeny. **c**, CAPS assays of selected positive E<sub>0</sub> plants using genome-  
330 specific primers. **d**, Mutations detected within the target region of positive E<sub>0</sub> plants. The  
331 gRNA sequence is underlined in the WT sequence. Protospacer adjacent motif (PAM)  
332 sequences are indicated in blue letters. Insertions and deletions are indicated in red letters.  
333 **e**, A genome-specific CAPS assay of an *sd1* mutant line (H7-1, E<sub>1</sub>). The A, B, and D  
334 genome sequences of H7-1 are aligned with the A genome sequence of the WT. The  
335 inserted nucleotide and PAM sequence are indicated by red and blue letters, respectively.  
336 **f**, Comparison of plant stature of *tasdl* (left) and WT (right) plants. Average tiller height  
337 based on measurements of all plants. Data represent the mean ± SE of seven *sd1* and six  
338 WT plants. **g**, Comparison of grain yield. Average total grain numbers and average total  
339 grain weight for each plant are shown. The data represent the mean ± SE of seven *sd1*  
340 and six WT plants.

341

342

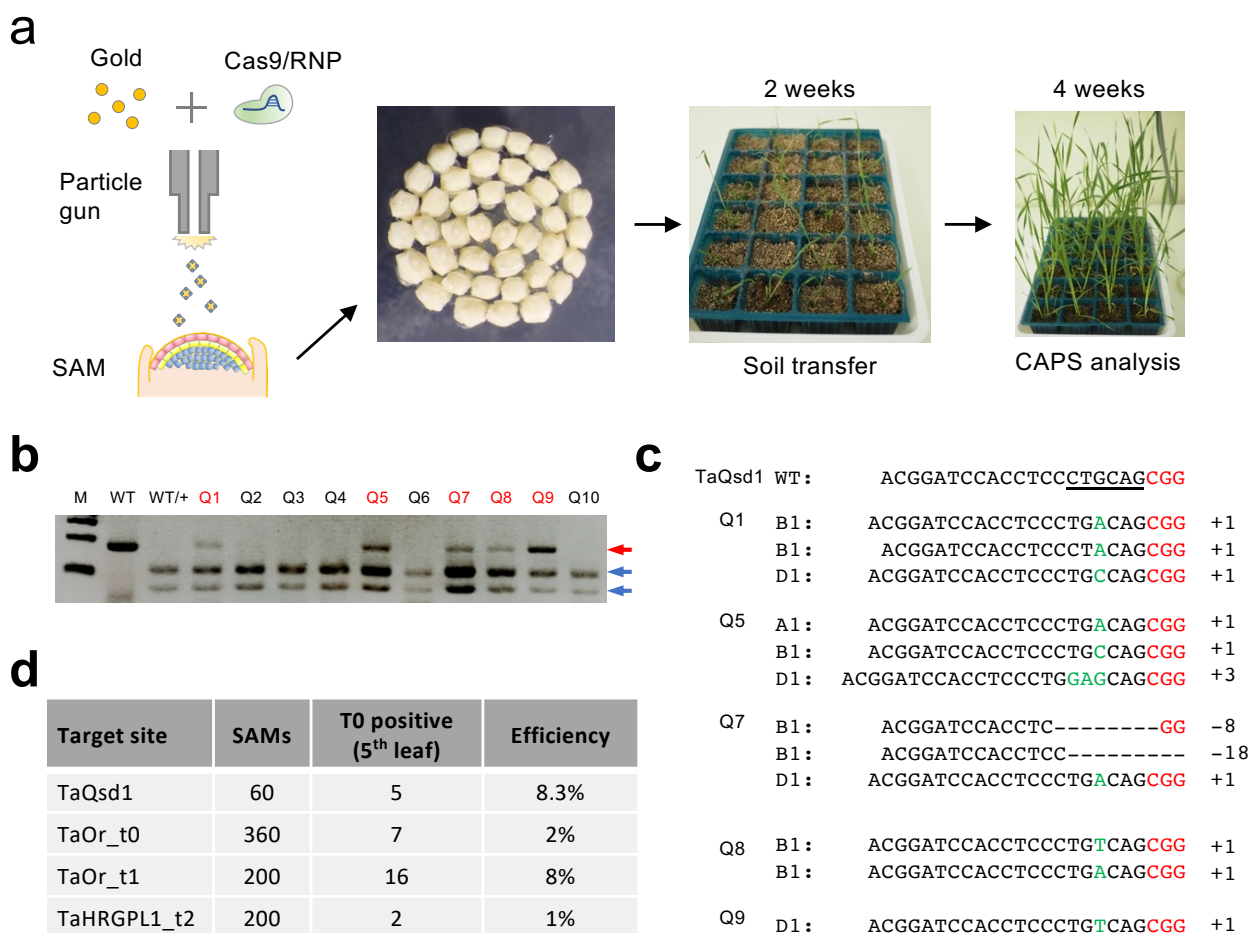

**Figure 1. *In planta* RNP-mediated genome editing in wheat**

**a**, The workflow of iPB-RNP method utilizing wheat SAMs. **b**, CAPS analysis of E<sub>0</sub> plants at the *TaQsd1* locus. The PCR products were amplified by an A, B, and D genome common primer set. WT, undigested PCR products; WT/+, *Pst* I digested PCR products. Red and blue arrows indicate undigested and digested bands after *Pst* I treatment, respectively. A 100 bp ladder was used as a size marker. **c**, The genotypes of Q1, Q5, Q7, Q8 and Q9 as identified by sequencing. The black and red characters indicate the gRNA and PAM sequences, respectively. The *Pst* I restriction site is underlined. Nucleotides inserted are shown in green characters. **d**, Summary of genome editing experiment on locus sites of *TaQsd1*, *TaOr\_t0*, *TaOr\_t1* and *TaHRGP-like\_t2* using the iPB-RNP method.

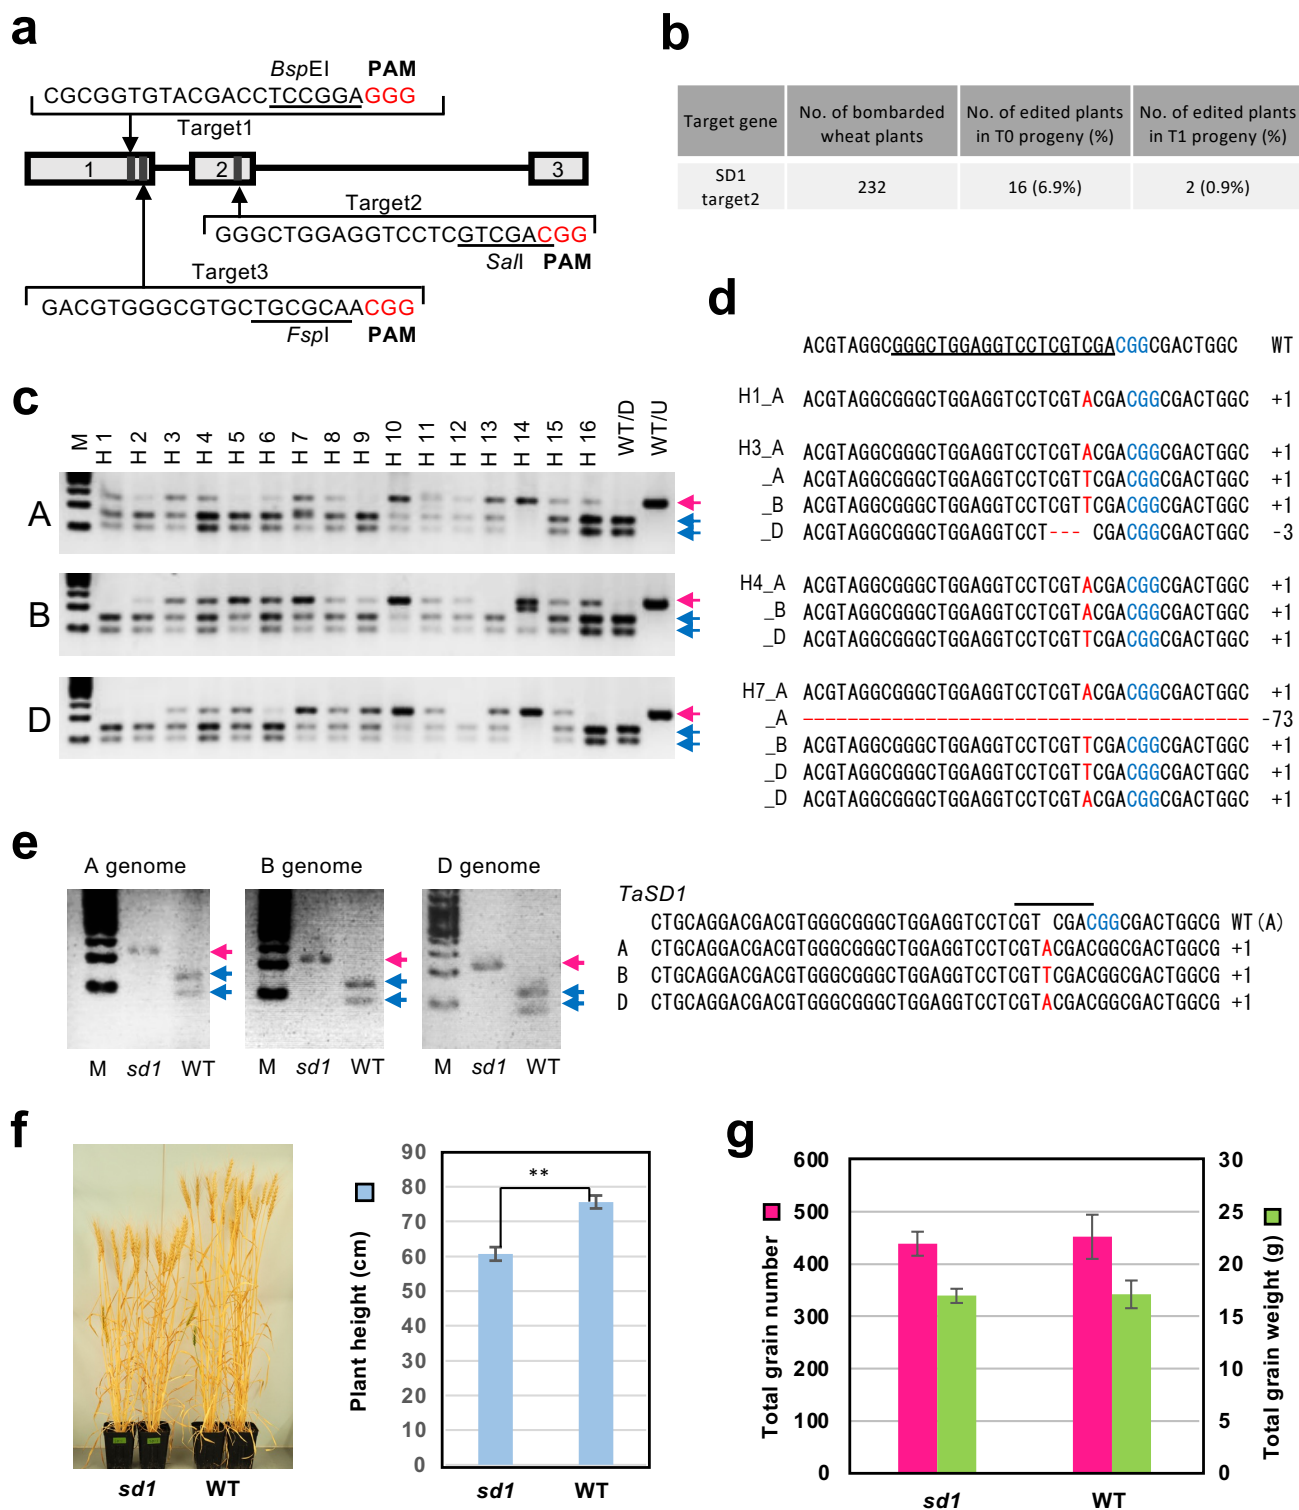

**Figure 2. Introduction of *sd1* mutations in wheat**

**a**, Target sequences conserved among the three homoeologous *TaSD1* genes were selected using the CRISPRdirect software. The locations of the target sequences are indicated by arrows. The boxes and lines indicate exons and introns, respectively. The three exons in *TaSD1* are numbered. **b**, Summary of the CAPS analysis of bombarded  $E_0$  plants and their progeny. **c**, CAPS assays of selected positive  $E_0$  plants using genome-specific primers. **d**, Mutations detected within the target region of positive  $E_0$  plants. The gRNA sequence is underlined in the WT sequence. Protospacer adjacent motif (PAM) sequences are indicated in blue letters. Insertions and deletions are indicated in red letters. **e**, A genome-specific CAPS assay of an *sd1* mutant line (H7-1,  $E_1$ ). The A, B, and D genome sequences of H7-1 are aligned with the A genome sequence of the WT. The inserted nucleotide and PAM sequence are indicated by red and blue letters, respectively. **f**, Comparison of plant stature of *tasd1* (left) and WT (right) plants. Average tiller height based on measurements of all plants. Data represent the mean  $\pm$  SE of seven *sd1* and six WT plants. **g**, Comparison of grain yield. Average total grain numbers and average total grain weight for each plant are shown. The data represent the mean  $\pm$  SE of seven *sd1* and six WT plants.
